# Supplementary material for: Cyclin B3 promotes anaphase I onset in oocyte meiosis
Source: PubMed Central journal article supplement — J Cell Biol. 2019 Feb 5;218(4):1265–81. doi: 10.1083/jcb.201808091 (PMC6446836; doi:10.1083/jcb.201808091), 2019-02-05
Supplement: JCB_201808091_sm.pdf [file JCB_201808091_sm.pdf]

## Supplemental material

Karasu et al., <https://doi.org/10.1083/jcb.201808091>

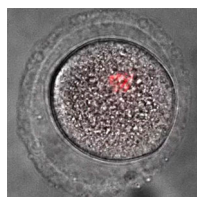

Video 1. **Progression through meiosis I in control oocyte.** A *Ccnb3*<sup>-/-</sup> oocyte incubated with SiR-DNA to visualize chromosomes. Acquisitions were started at GVBD + 6:30 (hours:minutes). 11 z-sections with 3- $\mu$ m steps were taken to follow chromosome movements, and shown are overlays of the stack. Acquisitions of the far-red and DIC channel were done every 20 min; 21 time points are shown. Related to Fig. 2 A. This is a representative video from 42 oocytes from six independent experiments.

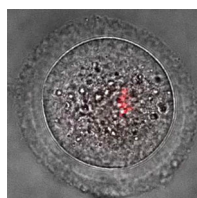

Video 2. **Progression through meiosis I in *Ccnb3*<sup>-/-</sup> oocyte.** A *Ccnb3*<sup>-/-</sup> oocyte incubated with SiR-DNA to visualize chromosomes. Acquisitions were started at GVBD + 6:30 (hours:minutes). 11 z-sections with 3- $\mu$ m steps were taken to follow chromosome movements, and shown are overlays of the stack. Acquisitions of the far-red and DIC channel were done every 20 min; 21 time points are shown. Related to Fig. 2 A. This is a representative video from 63 oocytes from six independent experiments.

Table S1. Primers used for cloning expression plasmids

| Primer ID | Primer (5'-3')                                 | Primers used to generate the plasmid indicated |
|-----------|------------------------------------------------|------------------------------------------------|
| p20       | ATCTGAATTCGGATCCGCCACCATGCCACCACCACTACTACCC    | pRN3-eRFP-cyclin B3                            |
| p21       | AGGAGGTCATGGATCCGTGGAATAATGCACAATTCAAAAGATTCTC |                                                |
| p30       | CTTTACTGCGCCTTGAGTTGAAG                        | pRN3-eRFP-cyclin B3 $\Delta$ dbx               |
| p31       | GCATCTCATAGTCAATGTGTCCAG                       |                                                |
| p37       | GAACTCACCAGTGATGCGGCAGCCATTGCTGTGGACTGGTTGGTG  | pRN3-eRFP-cyclin B3 MRL                        |
| p38       | CACCAACCAGTCCACAGCAATGGCTGCCGCATCACTGGTGAGTTC  |                                                |
| p92       | CGCGGGCCCGGGATCCATGATGCCTTCTCTTCGTCCATCTC      | pRN3-eGFP- <i>X.laevis</i> cyclin B3           |
| p93       | TAGATCCGGTGGATCCTTAGCTCTGAAGGGCCTCTGTAAG       |                                                |
| p100      | CGCGGGCCCGGGATCCATGCCGTTTTCAAAGGAAAAAGCCC      | pRN3-eGFP- <i>D. rerio</i> cyclin B3           |
| p101      | TAGATCCGGTGGATCCTCACTTCAAAGCCCTTCAAGCTTCTC     |                                                |
| p104      | CGCGGGCCCGGGATCCATGGCGCCCAAAAAGCAACAAC         | pRN3-eGFP- <i>D. melanogaster</i> cyclin B3    |
| p105      | TAGATCCGGTGGATCCCTACGACAGATTGCTTTTCGTTTCAGGTC  |                                                |
| p47       | TACTTCCAATCCAATATTATGCCACCACCACTACTACCC        | pFastBacI-MBP6His-cyclin B3 or cyclin B3 MRL   |
| p48       | TTATCCAATCCAATATTTCAAGTGAATAATGCACAATTCAAAAG   |                                                |
